# Supplementary material for: Synthesis of new stable and metastable thiocyanato coordination polymers by thermal decomposition and by solution reactions
Source: Royal Society of Chemistry journal article supplement (doi:10.1039/c2ce25389e), 2012-01-01
Supplement: c2ce25389e.pdf [file c2ce25389e.pdf]

## Electronic Supplementary Information

### Synthesis of New Stable and Metastable Thiocyanato Coordination Polymers by Thermal Decomposition and by Solution Reactions.

Susanne Wöhlert, Jan Boeckmann, Inke Jess and Christian Näther

|            |                                                                                                                                                                                                                                                                                                                                             |   |
|------------|---------------------------------------------------------------------------------------------------------------------------------------------------------------------------------------------------------------------------------------------------------------------------------------------------------------------------------------------|---|
| Figure S1  | Difference plot of $[\text{Cd}(\text{NCS})_2(\text{pyridine})_2]_n$ ( <b>2-Cd/III</b> ).                                                                                                                                                                                                                                                    | 3 |
| Figure S2  | Calculated X-ray powder pattern (XRPD) of $\text{Cd}(\text{NCS})_2$ (A) and experimental X-ray powder pattern of the residue formed in the second TG step in the thermal decomposition reaction of <b>1-Cd</b> (B) as well as of <b>2-Cd/III</b> calculated from Rietveld refinement (C).                                                   | 3 |
| Figure S3  | Crystal structure of <b>2-Cd/II</b> .                                                                                                                                                                                                                                                                                                       | 4 |
| Figure S4  | Crystal structure of <b>2-Cd/III</b> .                                                                                                                                                                                                                                                                                                      | 4 |
| Figure S5  | Crystal structure of <b>2-Cd/IV</b> .                                                                                                                                                                                                                                                                                                       | 5 |
| Figure S6  | Experimental X-ray powder pattern (XRPD) of a mixture single crystals of <b>2-Cd/II</b> and <b>2-Cd/IV</b> (A) and X-ray powder pattern of <b>2-Cd/II</b> (B) as well as <b>2-Cd/IV</b> (C) calculated from single crystal data.                                                                                                            | 6 |
| Figure S7  | DSC curve for $\text{Cd}(\text{NCS})_2(\text{pyridine})_4$ ( <b>1-Cd</b> ).                                                                                                                                                                                                                                                                 | 6 |
| Figure S8  | DSC heating and cooling cycles for $[\text{Cd}(\text{NCS})_2(\text{pyridine})_2]_n$ ( <b>2-Cd/II</b> ).                                                                                                                                                                                                                                     | 7 |
| Figure S9  | DSC heating and cooling cycles for $[\text{Cd}(\text{NCS})_2(\text{pyridine})_2]_n$ ( <b>2-Cd/III</b> ).                                                                                                                                                                                                                                    | 7 |
| Figure S10 | DSC heating and cooling cycles for $[\text{Cd}(\text{NCS})_2(\text{pyridine})_2]_n$ ( <b>2-Cd/IV</b> ).                                                                                                                                                                                                                                     | 8 |
| Figure S11 | X-ray powder pattern of the intermediates obtained at different temperatures in the DSC measurement of compound <b>2-Cd/II</b> and calculated X-ray powder pattern of $[\text{Cd}(\text{NCS})_2(\text{pyridine})_2]_n$ ( <b>2-Cd/II</b> ).                                                                                                  | 8 |
| Figure S12 | X-ray powder pattern of the intermediates obtained at different temperatures in the DSC measurements of compound <b>2-Cd/III</b> and X-ray powder pattern of $[\text{Cd}(\text{NCS})_2(\text{pyridine})_2]_n$ ( <b>2-Cd/III</b> ) calculated from Rietveld refinement and of $\text{Cd}(\text{NCS})_2$ calculated from single-crystal data. | 9 |
| Figure S13 | X-ray powder pattern of the intermediate obtained at 77 °C from the DSC measurement of compound <b>2-Cd/IV</b> as well as the X-ray powder pattern calculated for $[\text{Cd}(\text{NCS})_2(\text{pyridine})_2]_n$ ( <b>2-Cd/IV</b> ) from single-crystal data.                                                                             | 9 |

|            |                                                                                               |    |
|------------|-----------------------------------------------------------------------------------------------|----|
| Figure S14 | IR spectrum of $\text{Cd}(\text{NCS})_2(\text{pyridine})_4$ ( <b>1-Cd</b> ).                  | 10 |
| Figure S15 | IR spectrum of compound $[\text{Cd}(\text{NCS})_2(\text{pyridine})_2]_n$ ( <b>2-Cd/II</b> ).  | 10 |
| Figure S16 | IR spectrum of compound $[\text{Cd}(\text{NCS})_2(\text{pyridine})_2]_n$ ( <b>2-Cd/III</b> ). | 11 |
| Figure S17 | IR spectrum of compound $[\text{Cd}(\text{NCS})_2(\text{pyridine})_2]_n$ ( <b>2-Cd/IV</b> ).  | 11 |
| Figure S18 | IR spectrum of compound $[\text{Cd}(\text{NCS})_2(\text{pyridine})]_n$ ( <b>3-Cd</b> ).       | 12 |

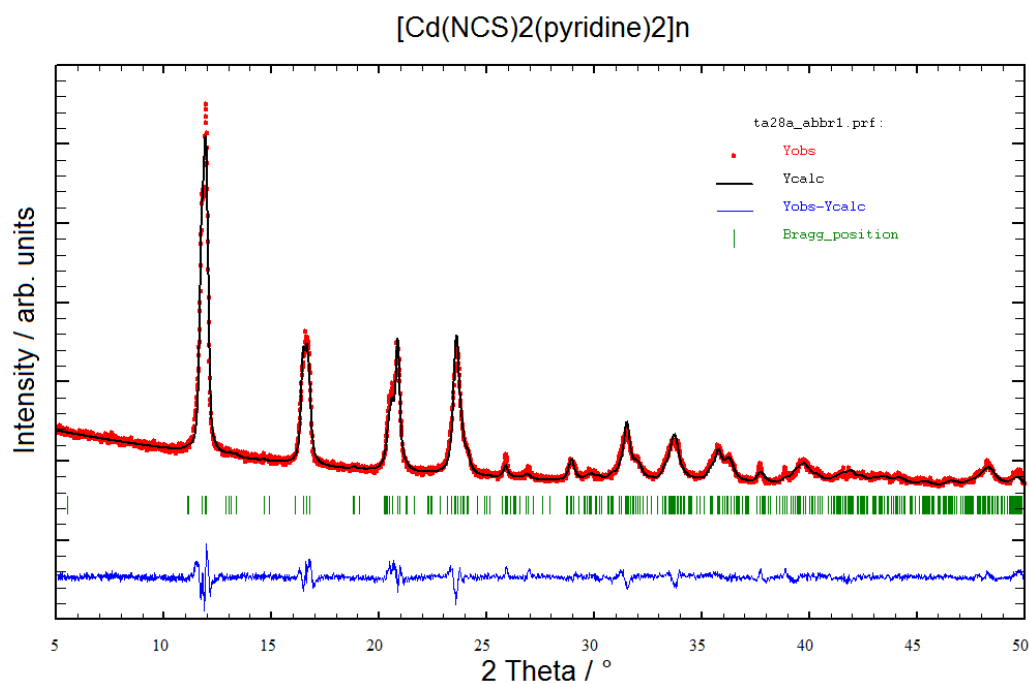

**Figure S1.** Difference plot of [Cd(NCS)<sub>2</sub>(pyridine)<sub>2</sub>]<sub>n</sub> (**2-Cd/III**).

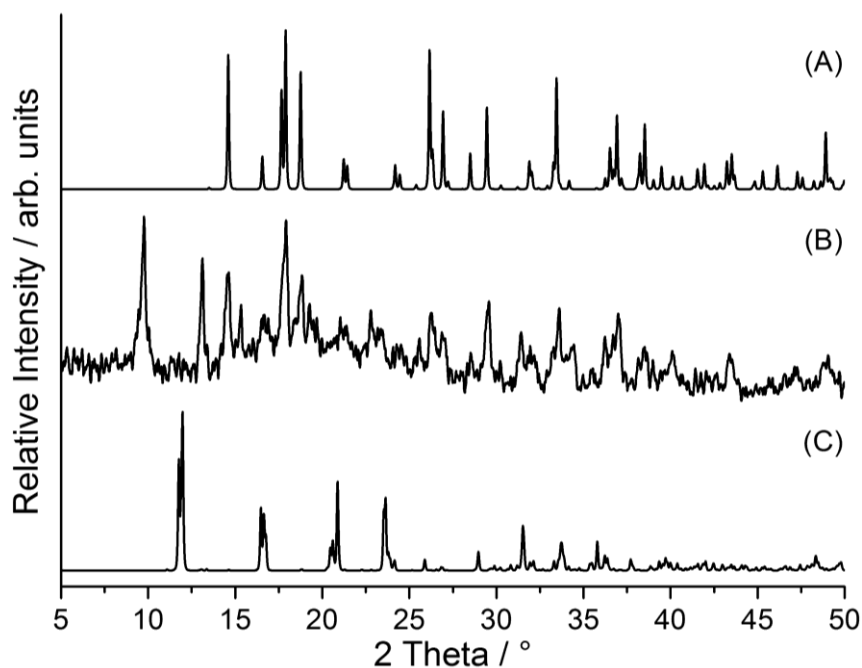

**Figure S2.** Calculated X-ray powder pattern (XRPD) of Cd(NCS)<sub>2</sub> (A) and experimental X-ray powder pattern of the residue formed in the second TG step in the thermal decomposition reaction of **1-Cd** (B) as well as of **2-Cd/III** calculated from Rietveld refinement (C).

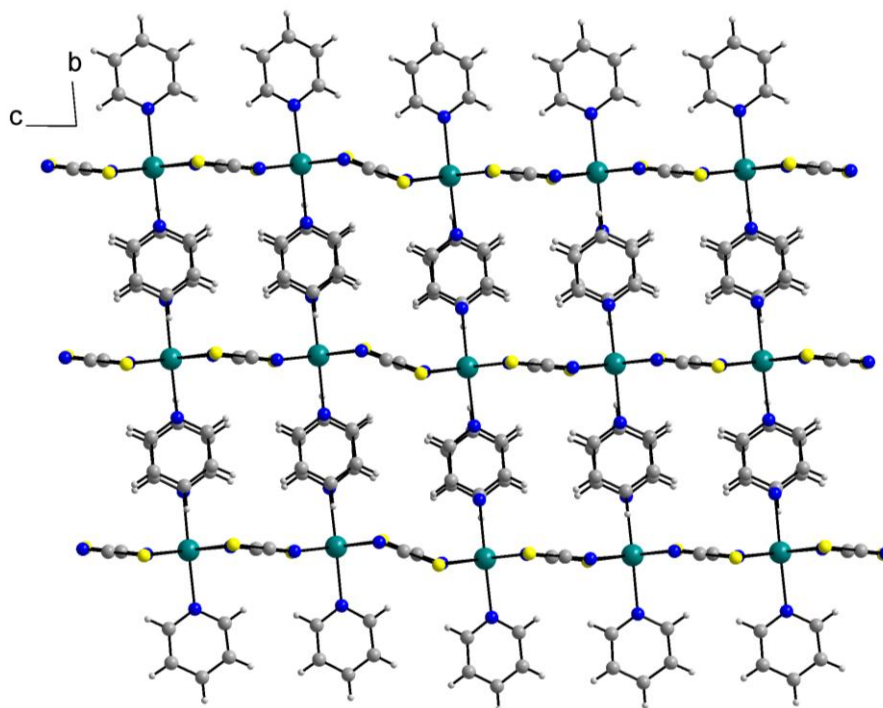

**Figure S3.** Crystal structure of **2-Cd/II** with view along the crystallographic *a*-axis (green = cadmium, blue = nitrogen, yellow = sulfur, grey = carbon, white = hydrogen).

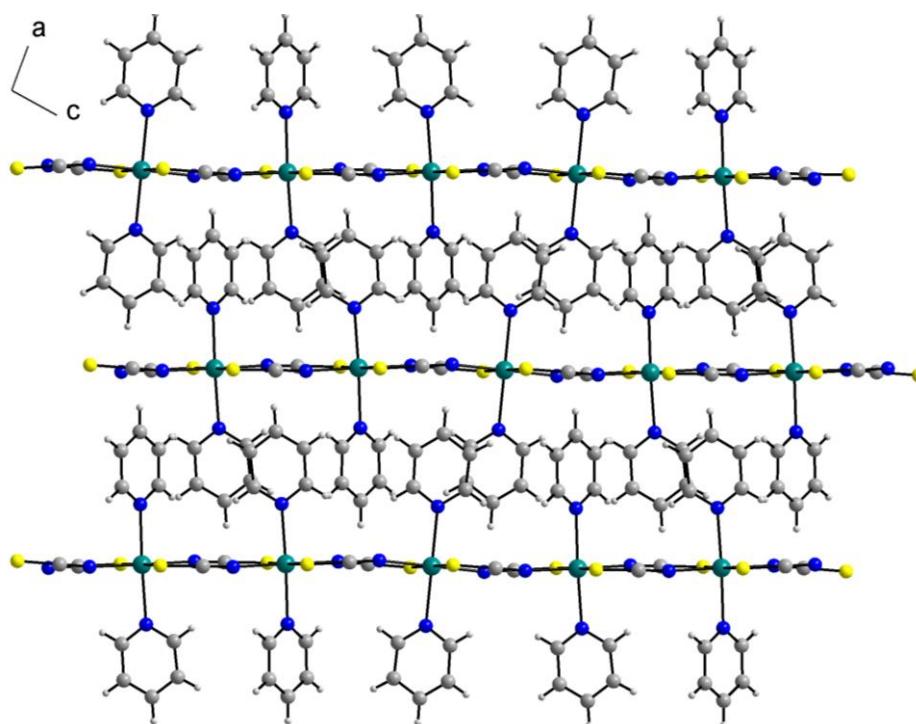

**Figure S4.** Crystal structure of **2-Cd/III** with view along the crystallographic *b*-axis (green = cadmium, blue = nitrogen, yellow = sulfur, grey = carbon, white = hydrogen).

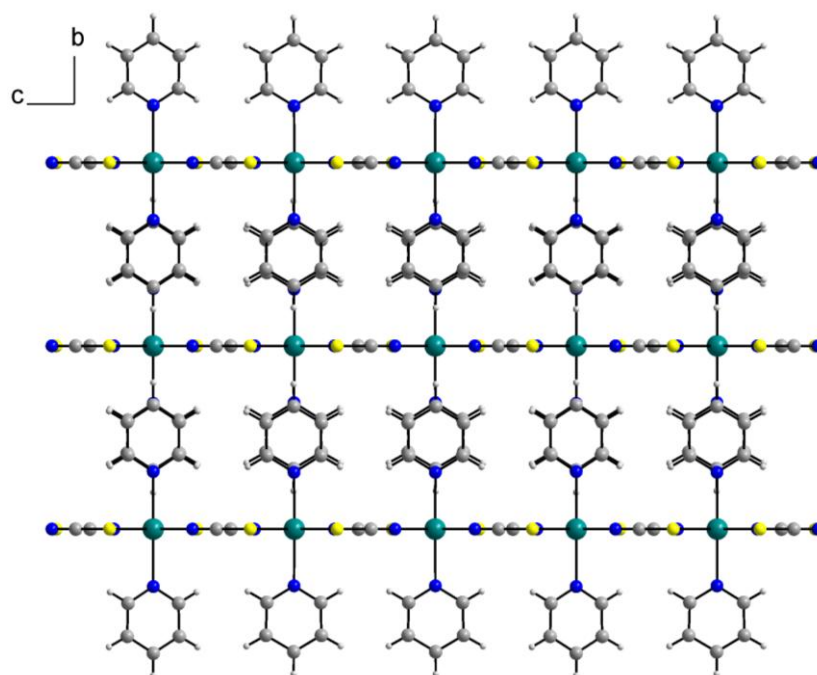

**Figure S5.** Crystal structure of **2-Cd/IV** with view along the crystallographic *a*-axis (green = cadmium, blue = nitrogen, yellow = sulfur, grey = carbon, white = hydrogen).

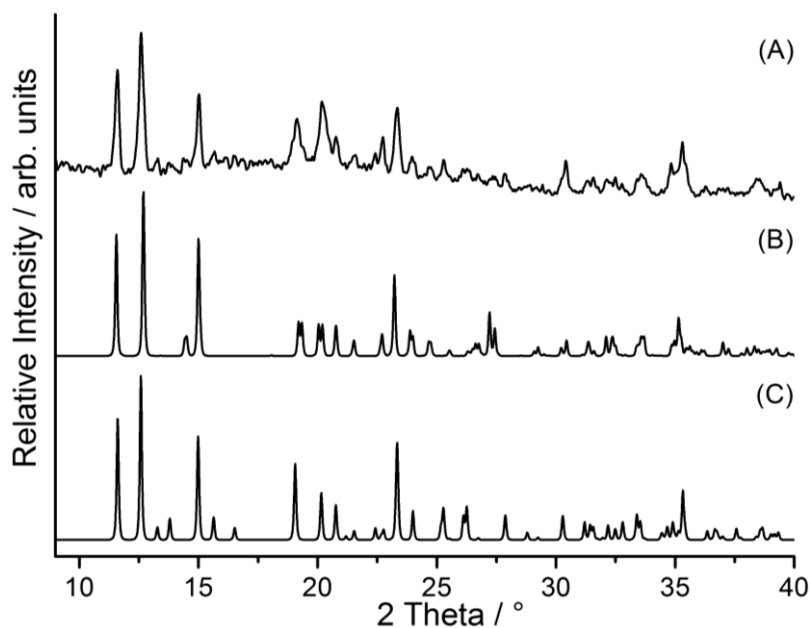

**Figure S6.** Experimental X-ray powder pattern (XRPD) of a mixture of single crystals of **2-Cd/II** and **2-Cd/IV** (A) and X-ray powder pattern of **2-Cd/II** (B) as well as **2-Cd/IV** (C) calculated from single-crystal data.

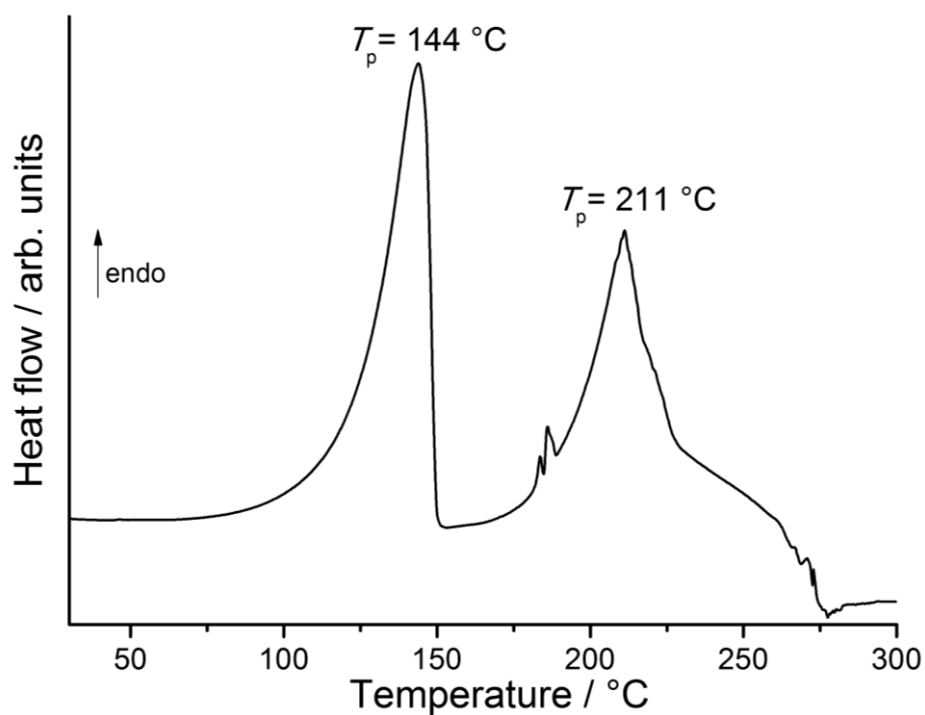

**Figure S7.** DSC curve for [Cd(NCS)<sub>2</sub>(pyridine)<sub>4</sub>] (**1-Cd**).

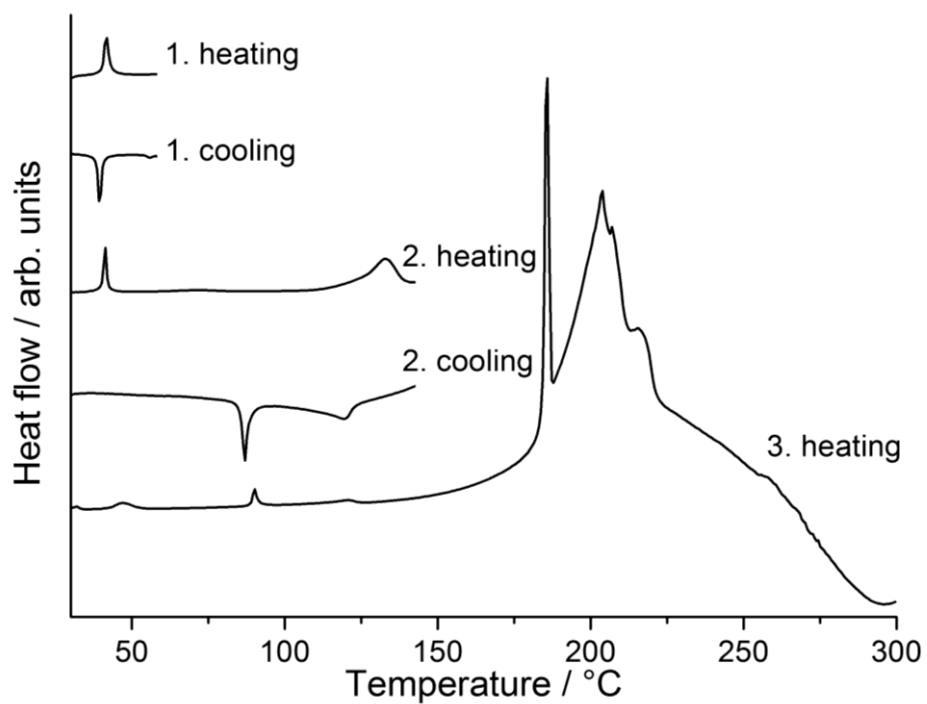

**Figure S8.** DSC heating and cooling cycles for [Cd(NCS)<sub>2</sub>(pyridine)<sub>2</sub>]<sub>n</sub> (**2-Cd/II**).

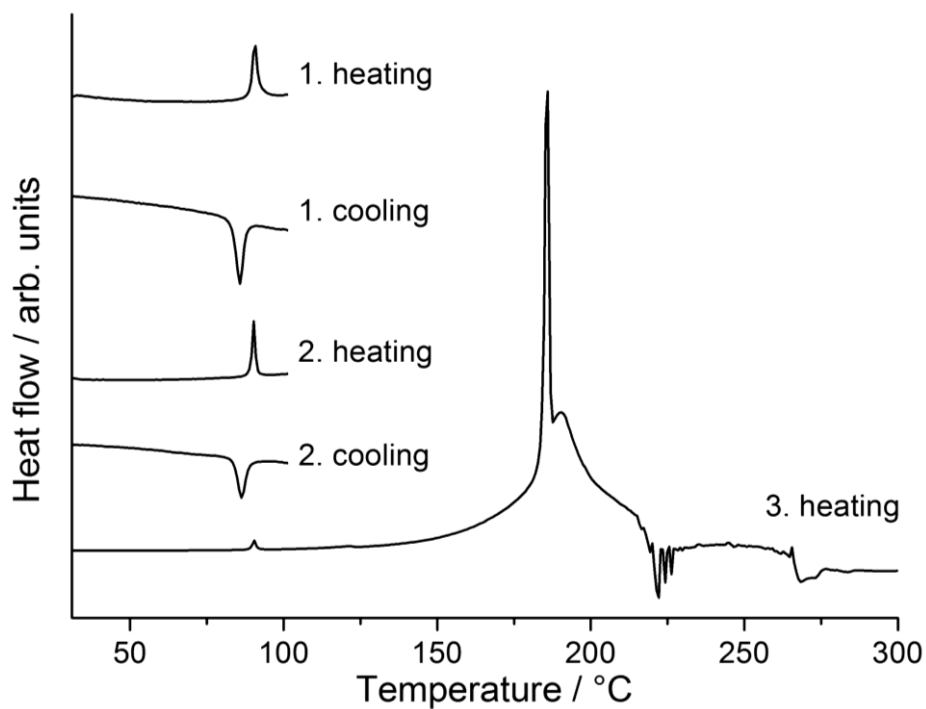

**Figure S9.** DSC heating and cooling cycles for [Cd(NCS)<sub>2</sub>(pyridine)<sub>2</sub>]<sub>n</sub> (**2-Cd/III**).

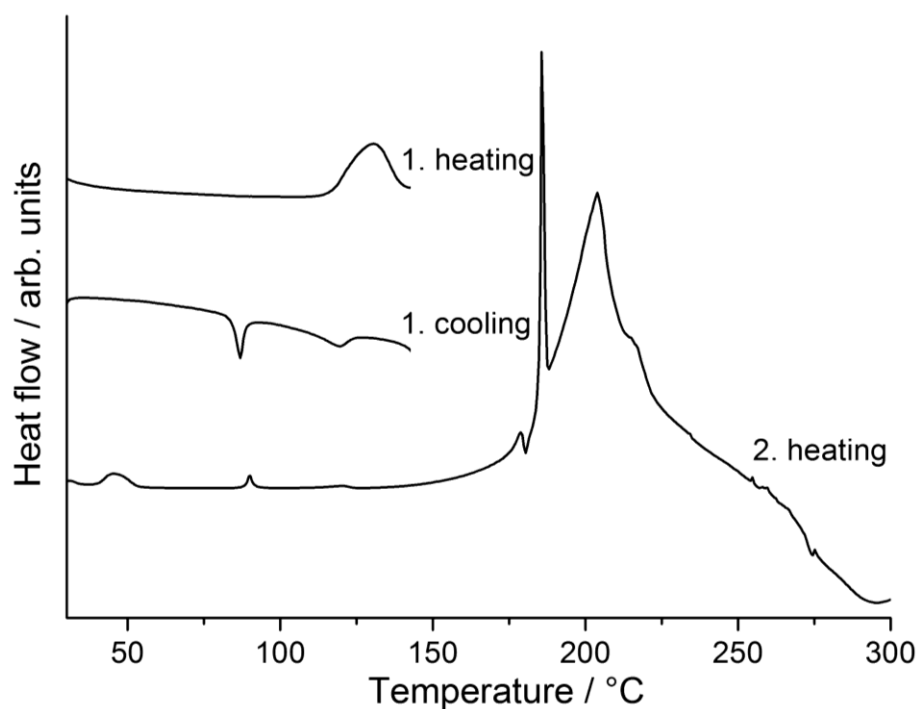

**Figure S10.** DSC heating and cooling cycles for  $[\text{Cd}(\text{NCS})_2(\text{pyridine})_2]_n$  (**2-Cd/IV**).

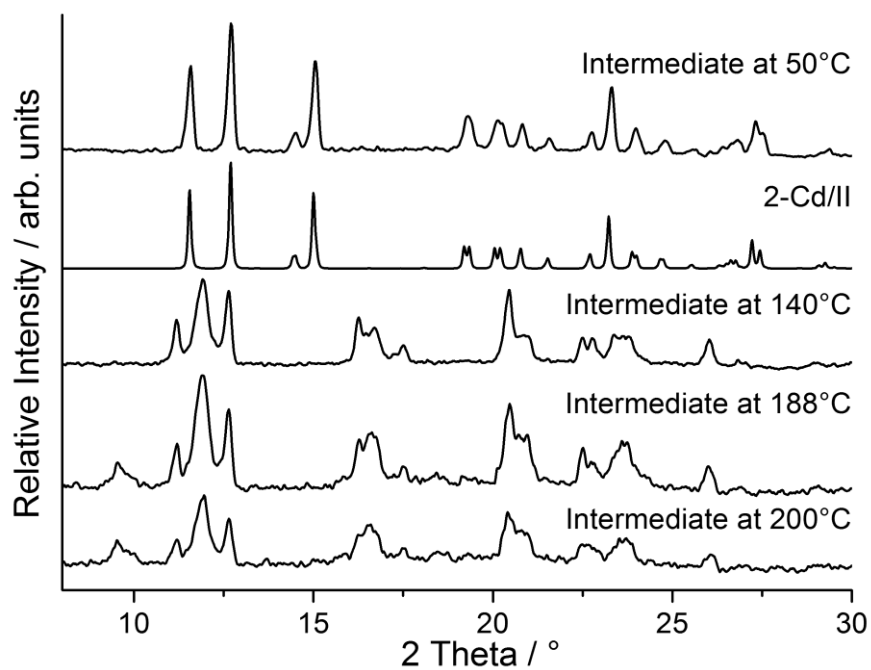

**Figure S11.** X-ray powder pattern of the intermediates obtained at different temperatures in the DSC measurement of compound **2-Cd/II** and X-ray powder pattern of  $[\text{Cd}(\text{NCS})_2(\text{pyridine})_2]_n$  (**2-Cd/II**) calculated from single-crystal data.



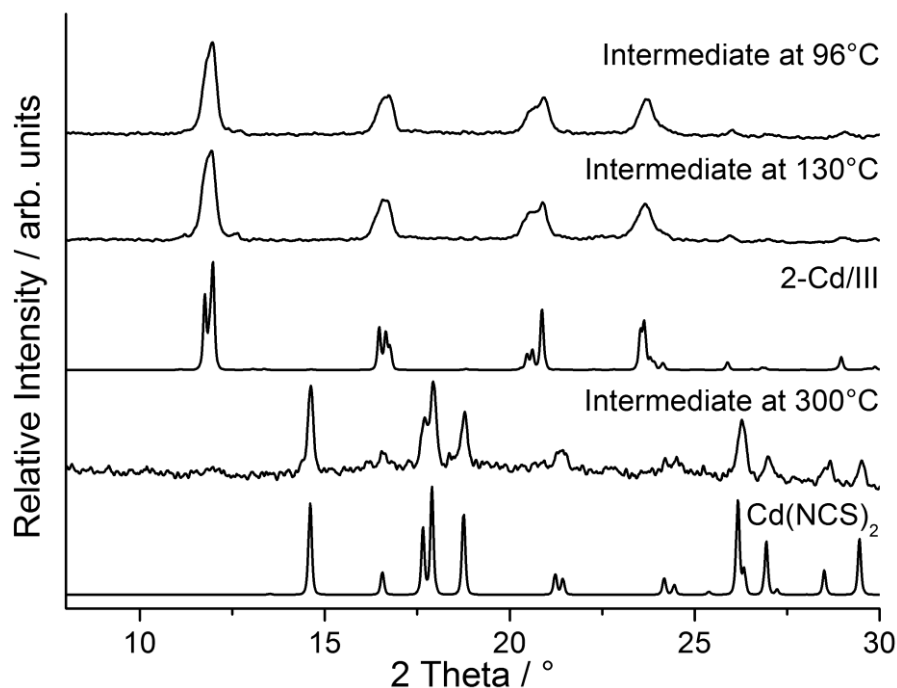

**Figure S12.** X-ray powder pattern of the intermediates obtained at different temperatures in the DSC measurements of compound **2-Cd/III** and X-ray powder pattern of  $[\text{Cd}(\text{NCS})_2(\text{pyridine})_2]_n$  (**2-Cd/III**) calculated from Rietveld refinement and of  $\text{Cd}(\text{NCS})_2$  calculated from single-crystal data.

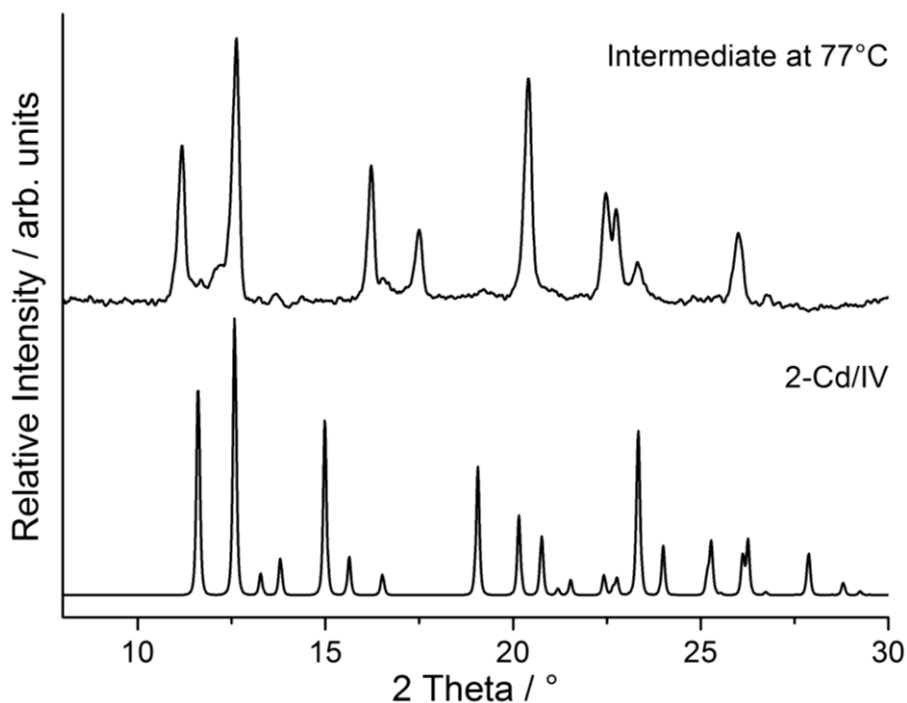

**Figure S13.** X-ray powder pattern of the intermediate obtained at 77°C from the DSC measurement of compound **2-Cd/IV** (top) as well as the X-ray powder pattern calculated for  $[\text{Cd}(\text{NCS})_2(\text{pyridine})_2]_n$  (**2-Cd/IV**) from single-crystal data.

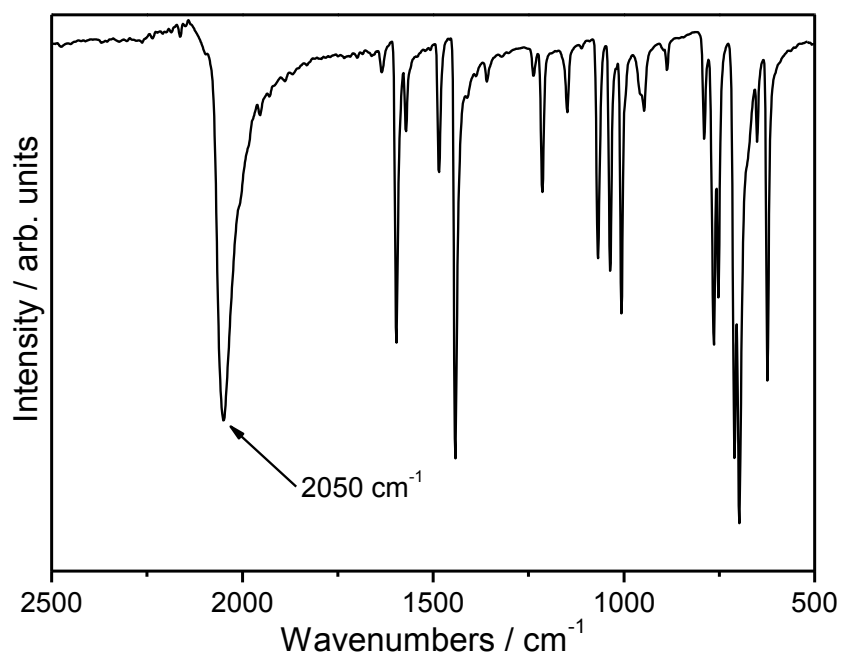

**Figure S14.** IR spectrum of [Cd(NCS)<sub>2</sub>(pyridine)<sub>4</sub>] (**1-Cd**).

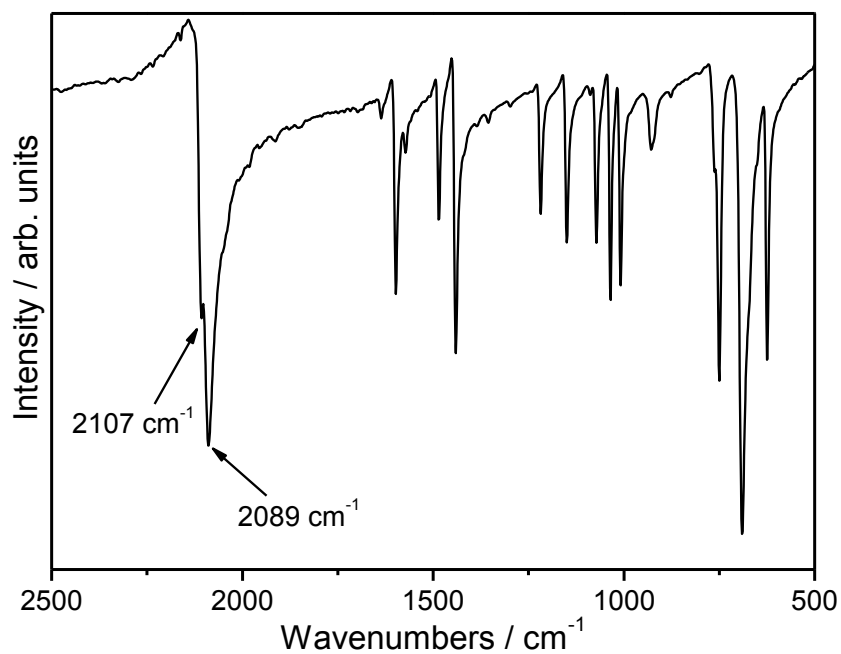

**Figure S15.** IR spectrum of the ligand-deficient 1:2 compound [Cd(NCS)<sub>2</sub>(pyridine)<sub>2</sub>]<sub>n</sub> (**2-Cd/II**).

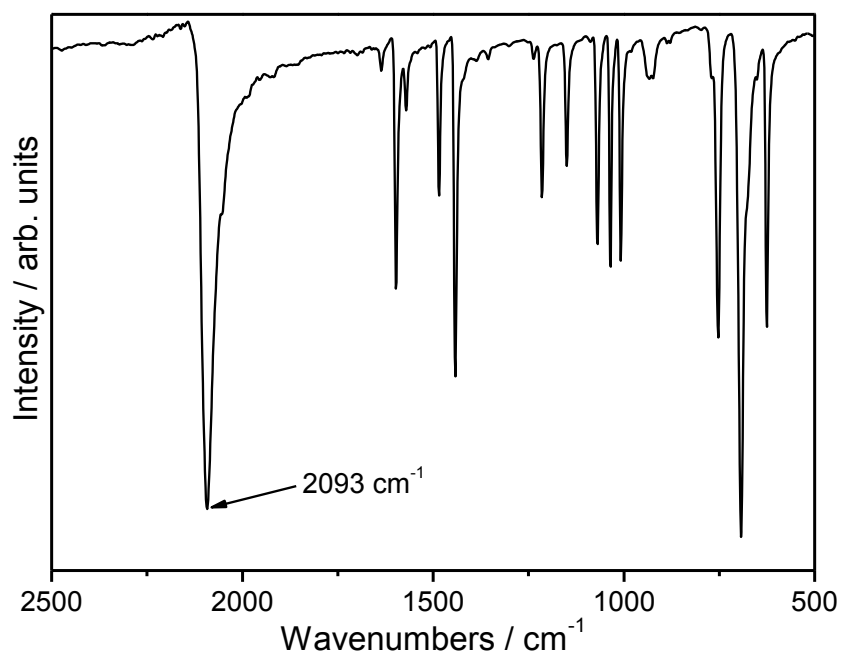

**Figure S16.** IR spectrum of  $[\text{Cd}(\text{NCS})_2(\text{pyridine})_2]_n$  (**2-Cd/III**).

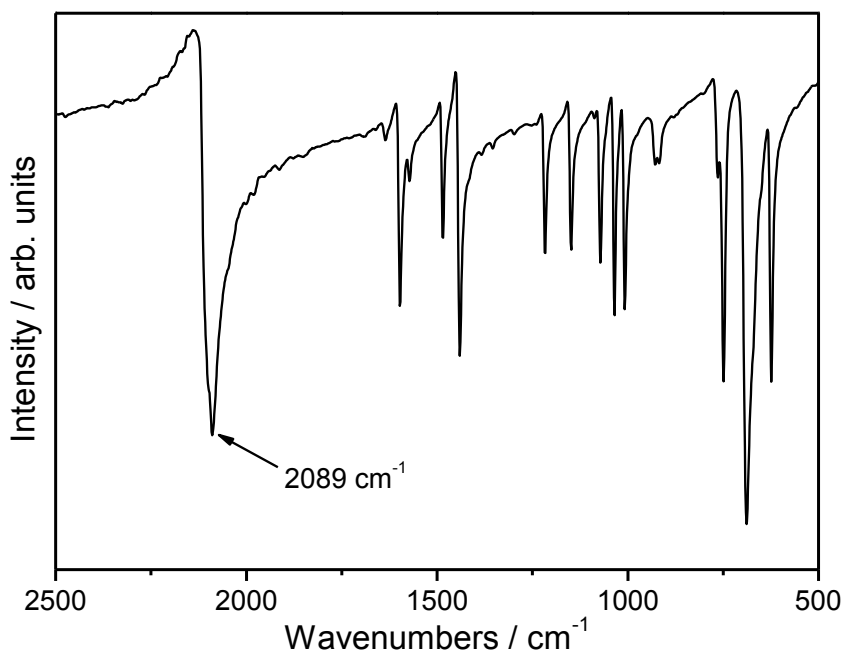

**Figure S17.** IR spectrum of  $[\text{Cd}(\text{NCS})_2(\text{pyridine})_2]_n$  (**2-Cd/IV**).

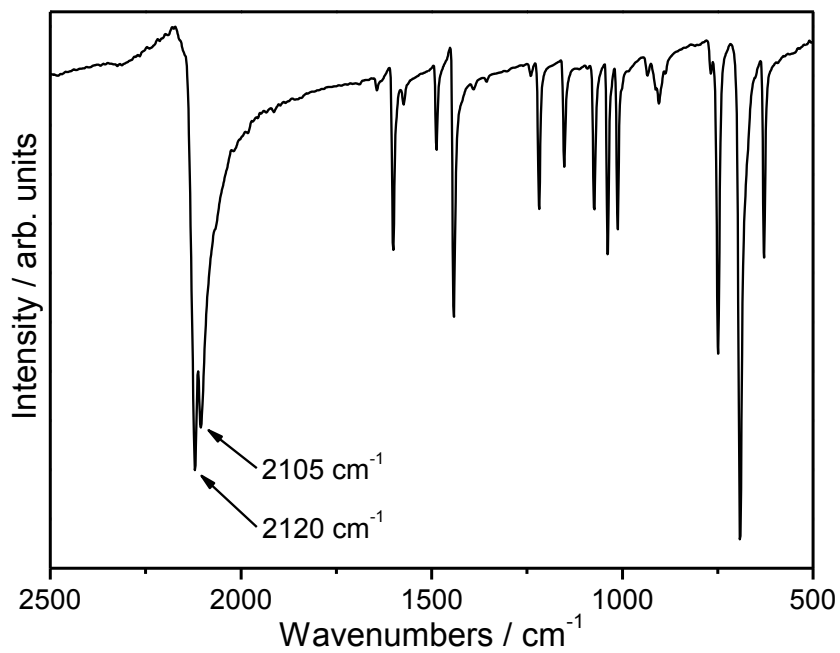

**Figure S18.** IR spectrum of  $[\text{Cd}(\text{NCS})_2(\text{pyridine})]_n$  (**3-Cd**).
